# Supplementary material
Source: HighWire-hosted journal article supplement (https://erj.ersjournals.com/content/58/4/2100989)
Supplement: inline-supplementary-material-1 [file inline-supplementary-material-1.pdf]

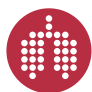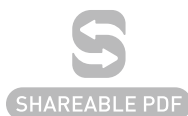

# Vitamin D supplementation, lung function and asthma control in children with asthma and low vitamin D levels

Yueh-Ying Han <sup>1</sup>, Erick Forno <sup>1</sup>, Leonard B. Bacharier<sup>2</sup>, Wanda Phipatanakul<sup>3</sup>, Theresa W. Guilbert<sup>4</sup>, Michael D. Cabana<sup>5</sup>, Kristie Ross<sup>6</sup>, Joshua Blatter<sup>7</sup>, Franziska J. Rosser<sup>1</sup>, Sandy Durrani<sup>4</sup>, James Luther<sup>8</sup>, Stephen R. Wisniewski<sup>8</sup> and Juan C. Celedón<sup>1</sup>

<sup>1</sup>Division of Pulmonary Medicine, Dept of Pediatrics, UPMC Children's Hospital of Pittsburgh, University of Pittsburgh, Pittsburgh, PA, USA. <sup>2</sup>Division of Allergy, Immunology, and Pulmonary Medicine, Dept of Pediatrics, Monroe Carell Jr Children's Hospital at Vanderbilt, Nashville, TN, USA. <sup>3</sup>Division of Allergy and Immunology, Dept of Pediatrics, Boston Children's Hospital, Harvard Medical School, Boston, MA, USA. <sup>4</sup>Division of Pulmonary Medicine, Dept of Pediatrics, Cincinnati Children's Hospital, University of Cincinnati College of Medicine, Cincinnati, OH, USA. <sup>5</sup>Dept of Pediatrics, Albert Einstein College of Medicine, Bronx, NY, USA. <sup>6</sup>Division of Pediatric Pulmonology, UH Rainbow Babies and Children's Hospital, Case Western Reserve University, Cleveland, OH, USA. <sup>7</sup>Division of Allergy, Immunology, and Pulmonary Medicine, Dept of Pediatrics, Saint Louis Children's Hospital, Washington University at Saint Louis, Saint Louis, MO, USA. <sup>8</sup>Dept of Epidemiology, University of Pittsburgh, Pittsburgh, PA, USA.

Corresponding author: Juan C. Celedón ([juan.celedon@chp.edu](mailto:juan.celedon@chp.edu))

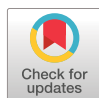

Shareable abstract (@ERSpublications)

**Vitamin D supplementation, compared with placebo, had no significant effect on percent predicted lung function measures (FEV1, FVC or FEV1/FVC), asthma control, or asthma-related quality of life in children with asthma and low vitamin D levels** <https://bit.ly/3ibbT4u>

**Cite this article as:** Han Y-Y, Forno E, Bacharier LB, *et al.* Vitamin D supplementation, lung function and asthma control in children with asthma and low vitamin D levels. *Eur Respir J* 2021; 58: 2100989 [DOI: 10.1183/13993003.00989-2021].

This single-page version can be shared freely online.

Copyright ©The authors 2021. For reproduction rights and permissions contact [permissions@ersnet.org](mailto:permissions@ersnet.org)

Received: 4 April 2021  
Accepted: 6 July 2021

## To the Editor:

Observational studies have shown that low vitamin D levels are associated with decreased lung function, worse asthma control, and lower quality of life in children with asthma [1–3]. Moreover, a small randomised imbalanced placebo-controlled trial reported that vitamin D supplementation improved asthma control, but not lung function measures, after 2 months of treatment. In that trial, children were not selected based on low vitamin D levels, asthma management was not standardised across treatment arms, and a low dose of vitamin D (800 IU per day) was used in the treatment arm [4].
